# Supplementary material for: Structure and synthesis of copper-based Schiff base and reduced Schiff base complexes: a combined experimental and theoretical investigation of biomimetic catalytic activity
Source: Royal Society of Chemistry journal article supplement (doi:10.1039/d0dt02784g), 2020-01-01
Supplement: d0dt02784g1.pdf [file d0dt02784g1.pdf]

# Structure and Synthesis of Copper Based Schiff base and Reduced Schiff base Complex: A Combined Experimental and Theoretical Investigation of Biomimetic Catalytic Activity

Arnab Mandal,<sup>a</sup> Abani Sarkar,<sup>a</sup> Amit Adhikary,<sup>a</sup> Debabrata Samanta,<sup>b</sup> and Debasis Das<sup>\*,a</sup>

<sup>a</sup> Department of Chemistry, University of Calcutta, 92, A. P. C. Road, Kolkata 700009, India. E-mail: [dasdebasis2001@yahoo.com](mailto:dasdebasis2001@yahoo.com)

<sup>b</sup> Department of Chemistry, Dukhulal Nibaran Chandra (DNC) College, Aurangabad, West Bengal -742201, India.

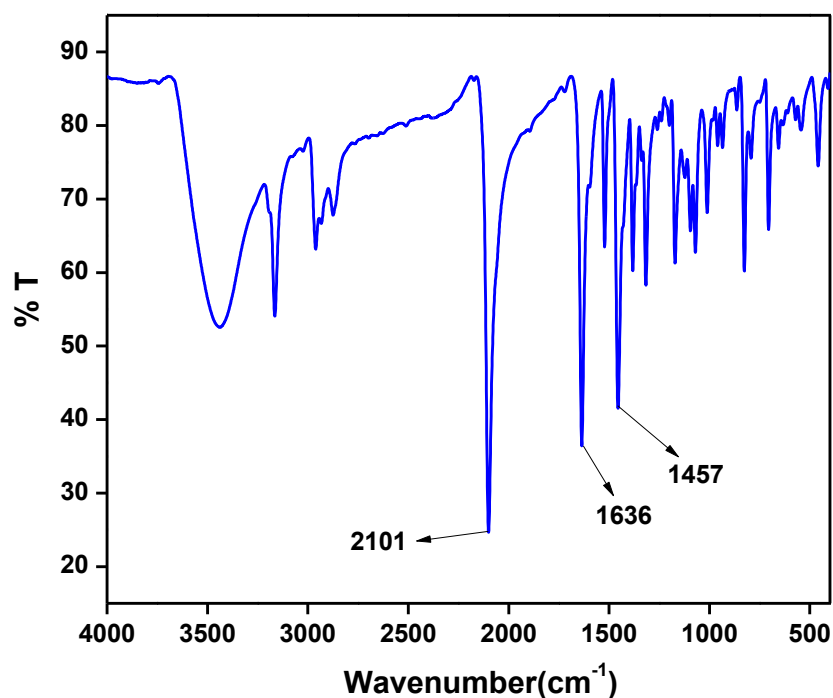

Fig. S1 FTIR spectrum of complex 1.

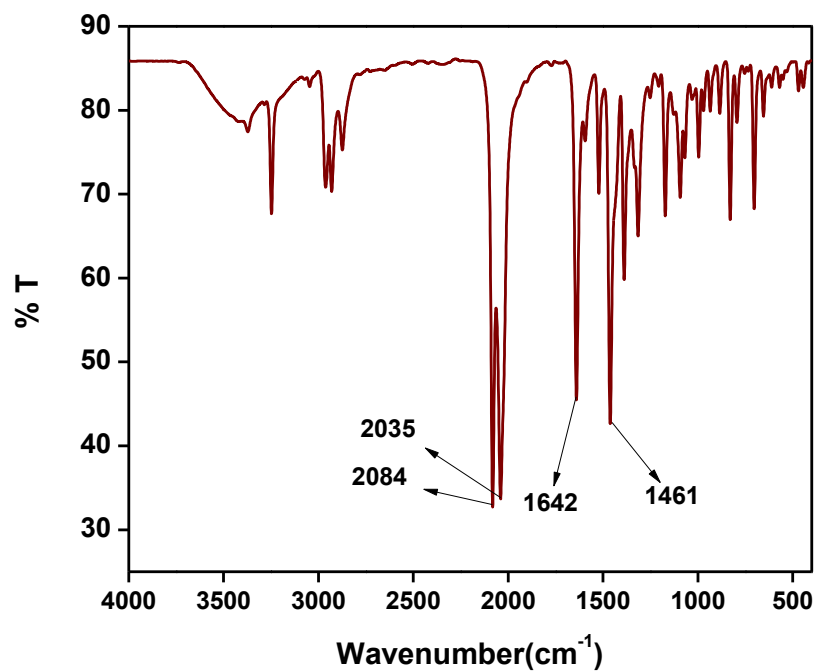

**Fig. S2** FTIR spectrum of complex 2.

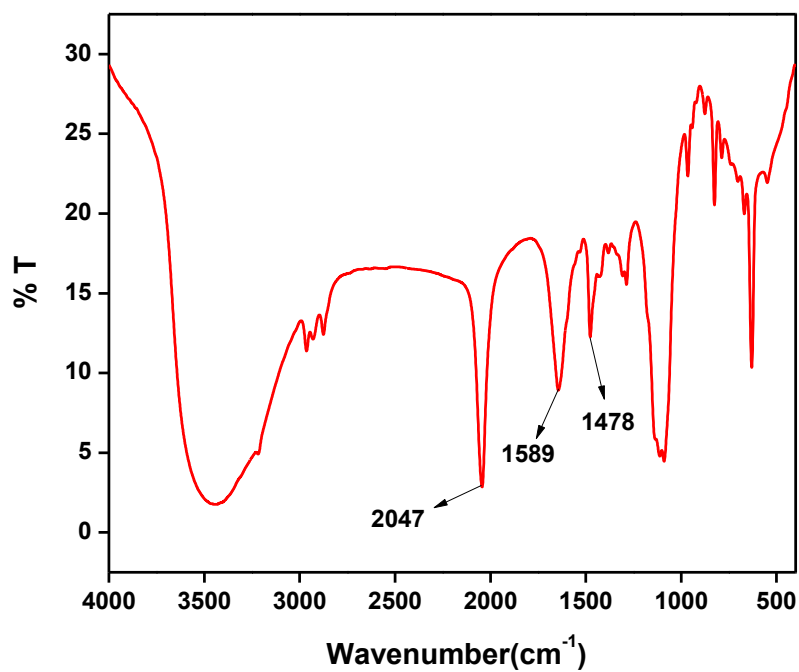

**Fig. S3** FTIR spectrum of complex 3.

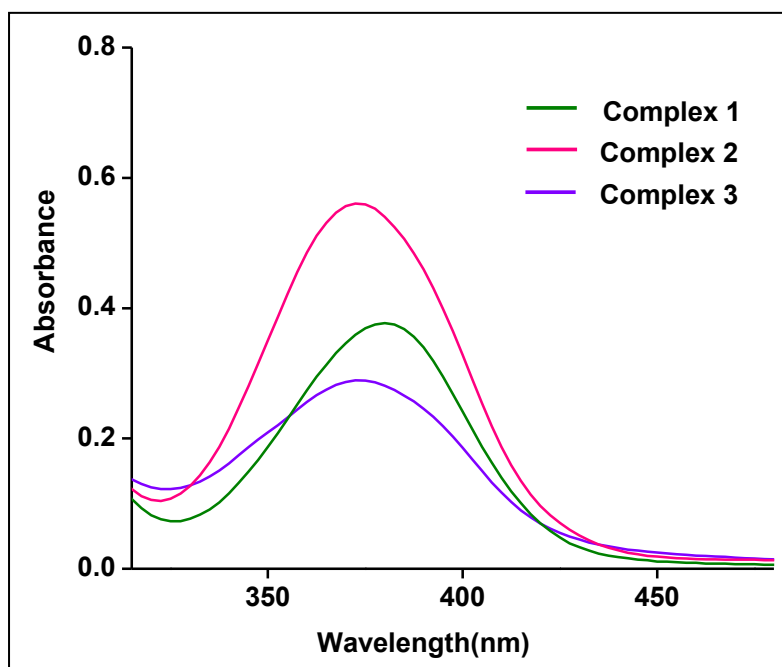

Fig. S4 UV spectra of the complexes 1-3 at room temperature.

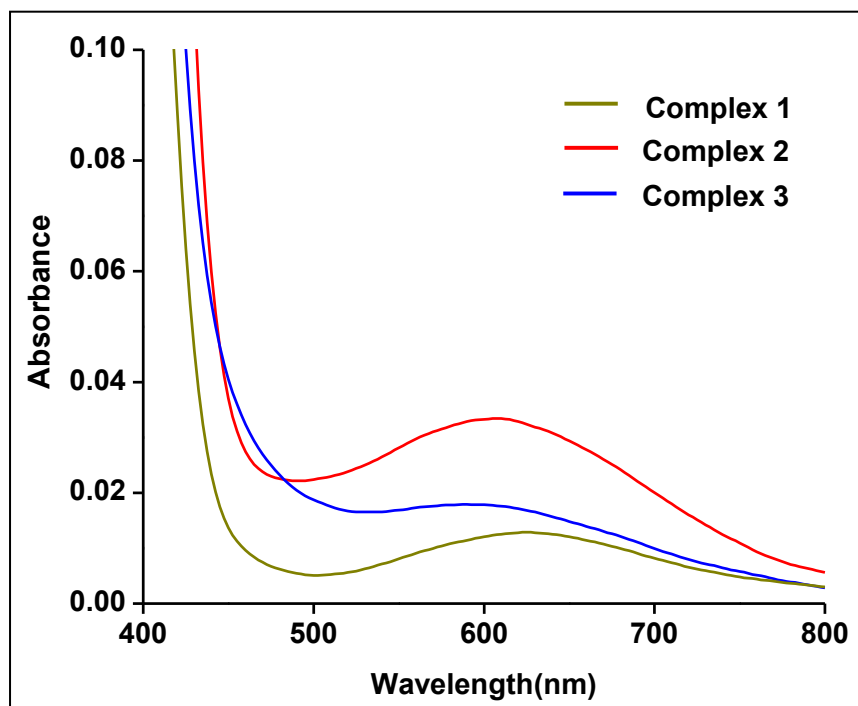

Fig. S5 d-d band of the complexes 1-3.

**Table S1** Crystallographic data and details of refinement for complex **1**, **2** & **3**

|                                                                    | <b>1</b>                                              | <b>2</b>                                             | <b>3</b>                                             |
|--------------------------------------------------------------------|-------------------------------------------------------|------------------------------------------------------|------------------------------------------------------|
| CCDC Number                                                        | 2020943                                               | 2020944                                              | 2020946                                              |
| Empirical formula                                                  | C <sub>13</sub> H <sub>16</sub> ClCuN <sub>3</sub> OS | C <sub>12</sub> H <sub>16</sub> ClCuN <sub>5</sub> O | C <sub>12</sub> H <sub>18</sub> ClCuN <sub>5</sub> O |
| Formula weight                                                     | 361.35                                                | 344.28                                               | 347.18                                               |
| Crystal system                                                     | monoclinic                                            | monoclinic                                           | monoclinic                                           |
| Space group                                                        | P2 <sub>1</sub> /n                                    | P2 <sub>1</sub> /c                                   | P2 <sub>1</sub> /c                                   |
| <i>a</i> /Å                                                        | 5.93020(10)                                           | 13.10(2)                                             | 20.7663(17)                                          |
| <i>b</i> /Å                                                        | 20.8486(4)                                            | 8.630(14)                                            | 9.4400(7)                                            |
| <i>c</i> /Å                                                        | 12.2568(3)                                            | 13.62(2)                                             | 7.5810(7)                                            |
| $\alpha$ /°                                                        | 90                                                    | 90                                                   | 90                                                   |
| $\beta$ /°                                                         | 93.582(2)                                             | 97.62(4)                                             | 98.352(6)                                            |
| $\gamma$ /°                                                        | 90                                                    | 90                                                   | 90                                                   |
| Volume/Å <sup>3</sup>                                              | 1512.43(5)                                            | 1526(4)                                              | 1470.4(2)                                            |
| Density(g/cm <sup>3</sup> )                                        | 1.587                                                 | 1.498                                                | 1.568                                                |
| <i>Z</i>                                                           | 4                                                     | 4                                                    | 4                                                    |
| <i>F</i> (000)                                                     | 740.0                                                 | 704.0                                                | 718.1                                                |
| $\mu$ /mm <sup>-1</sup>                                            | 1.756                                                 | 1.608                                                | 1.670                                                |
| Mo K $\alpha$ radiation                                            | $\lambda$ =0.71073Å                                   | $\lambda$ =0.71073Å                                  | $\lambda$ =0.71073Å                                  |
| Temperature/K                                                      | 293(2)                                                | 290(2)                                               | 293(2)                                               |
| <i>R</i> <sub>int</sub>                                            | 0.0593                                                | 0.0962                                               | 0.1448                                               |
| $\theta$ <sub>min/max</sub> /°                                     | 3.331/30.661                                          | 2.801/29.654                                         | 1.890/24.887                                         |
| Reflections collected/<br>unique $[I > 2\sigma(I)]$ <sup>[a]</sup> | 23109/3314                                            | 34951/2486                                           | 20502/1688                                           |
| GOF on <i>F</i> <sup>2</sup>                                       | 1.056                                                 | 1.007                                                | 1.175                                                |

|                                      |                                 |                                 |                                 |
|--------------------------------------|---------------------------------|---------------------------------|---------------------------------|
| $R_{\text{indices}}[I > 2\sigma(I)]$ | $RI = 0.0389$<br>$wR2 = 0.0730$ | $RI = 0.0516$<br>$wR2 = 0.1100$ | $RI = 0.1216$<br>$wR2 = 0.3293$ |
|--------------------------------------|---------------------------------|---------------------------------|---------------------------------|

$$[a] R1 = \frac{\sum |Fo| - |Fc|}{\sum |Fo|}, wR2 = \left[ \frac{\sum w (Fo^2 - Fc^2)^2}{\sum w (Fo^2)^2} \right]^{1/2}$$

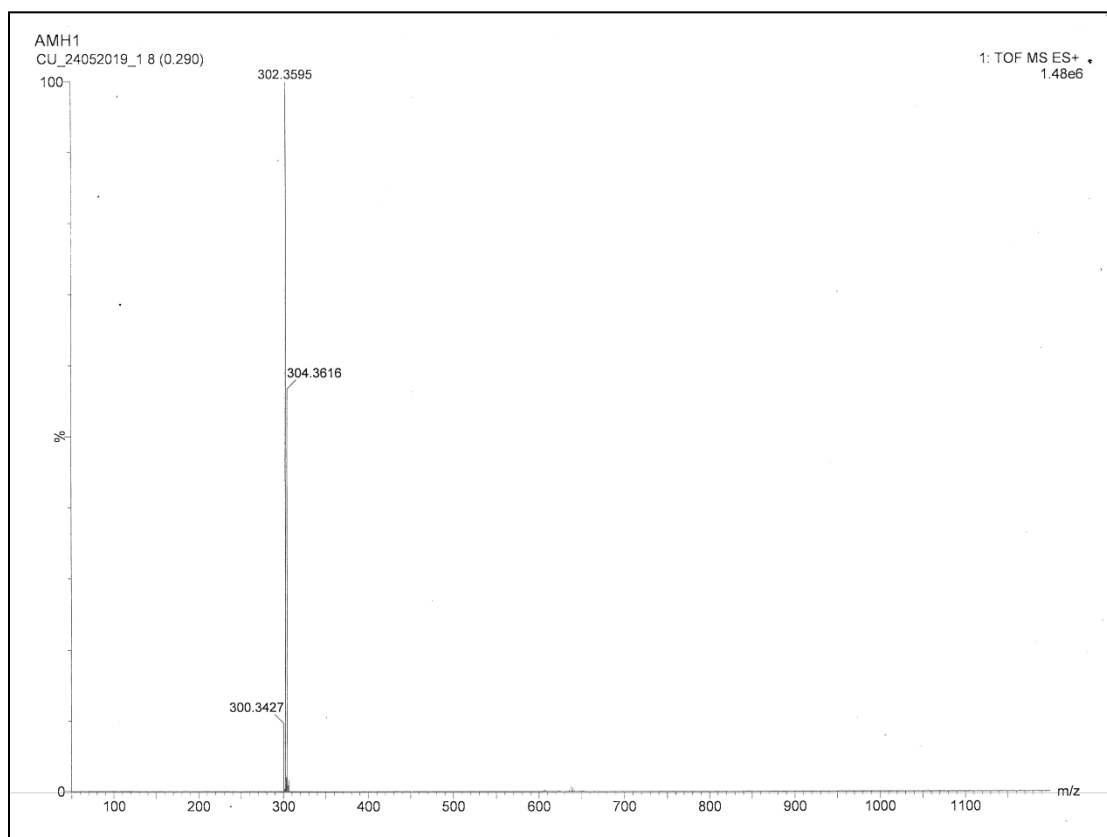

**Fig. S6** ESI-MS spectrum of complex **1**.

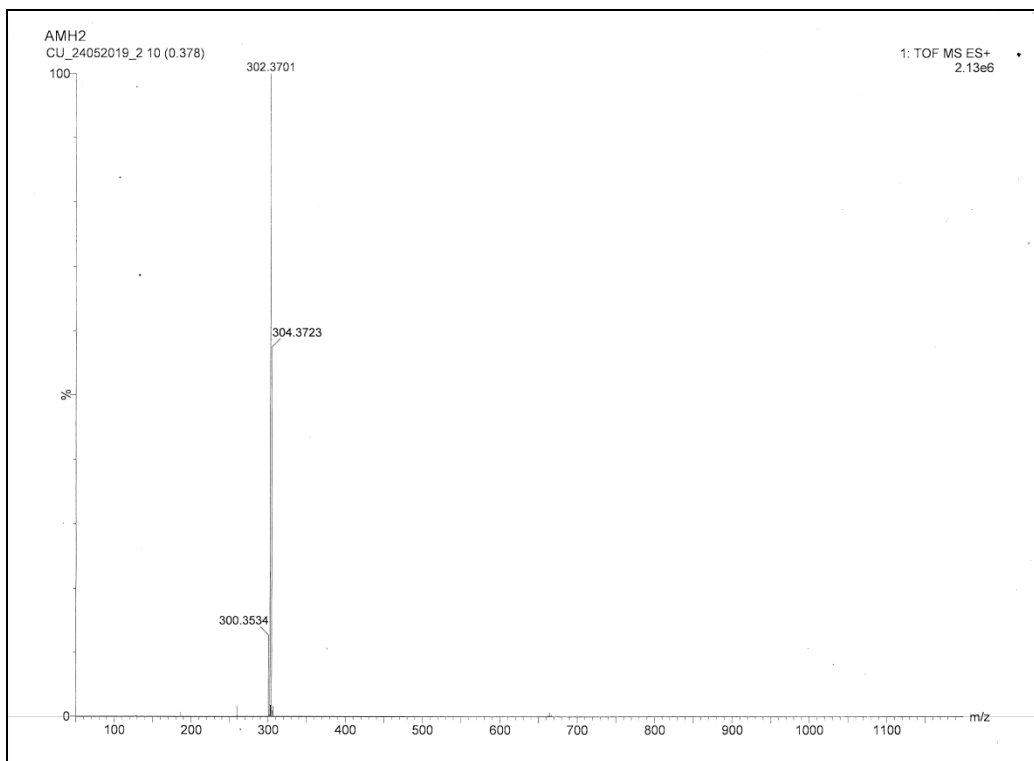

**Fig. S7** ESI-MS spectrum of complex 2

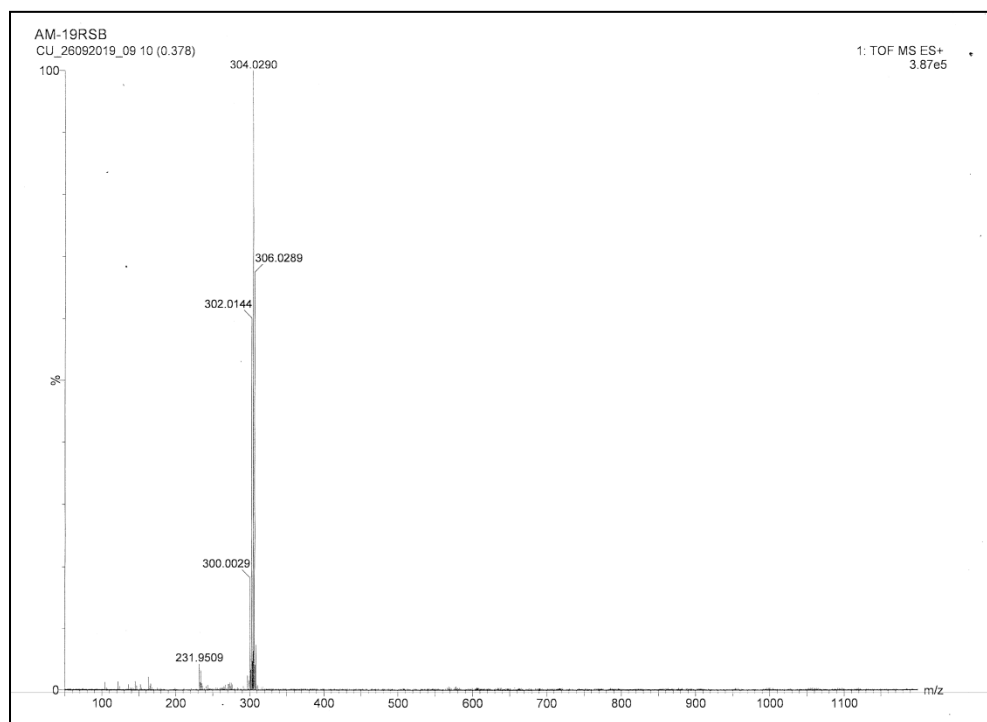

**Fig. S8** ESI-MS spectrum of complex 3

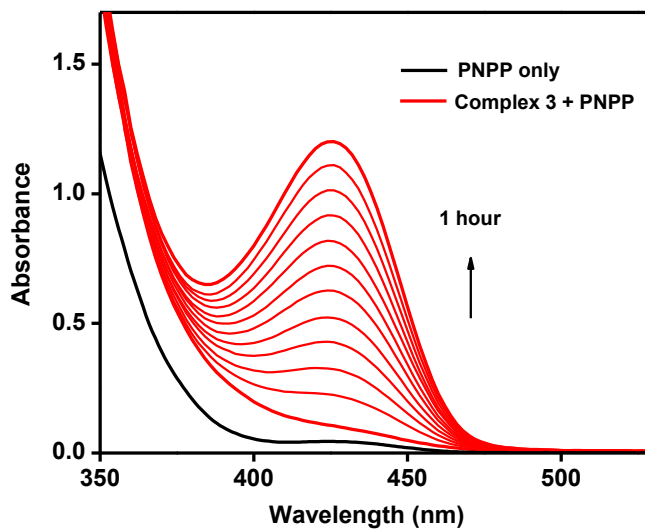

**Fig. S9** Wavelength scan for the hydrolysis of 4-NPP in the presence of complex **3** in 97.5% DMF recorded at 25 °C at intervals of 5 min for 1 h.

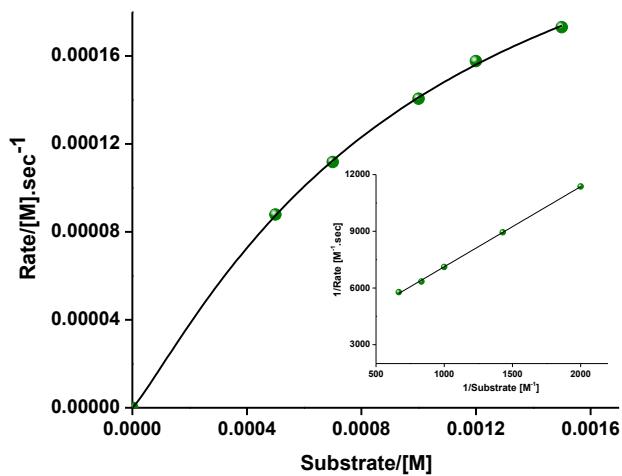

**Fig. S10** Kinetics plot for the hydrolysis of 4-NPP of complex **3** (insets: Lineweaver Burk plot)

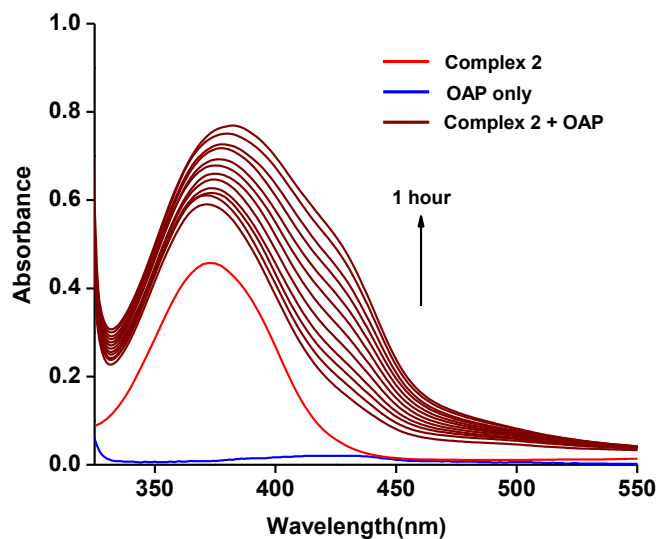

**Fig. S11** UV-Vis spectral scans showing an increase of the APX band at 420 nm after addition of o-aminophenol to a solution of complex **2** in DMF at 25 °C. The spectra were recorded at 5 min interval.

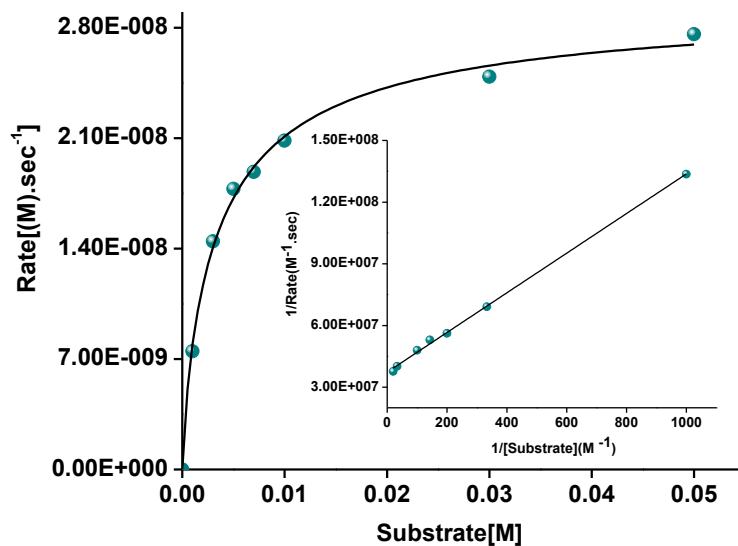

**Fig. S12** Kinetic plot of OAP oxidation by complex **2** (insets: Lineweaver Burk plot)



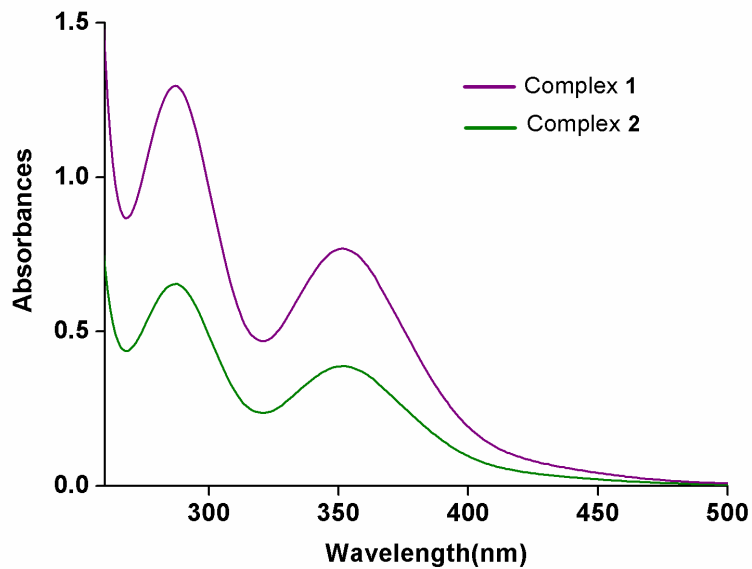

**Fig. S13** Detection of  $\text{H}_2\text{O}_2$  formation during oxidation of OAP observed in UV-Vis spectra.

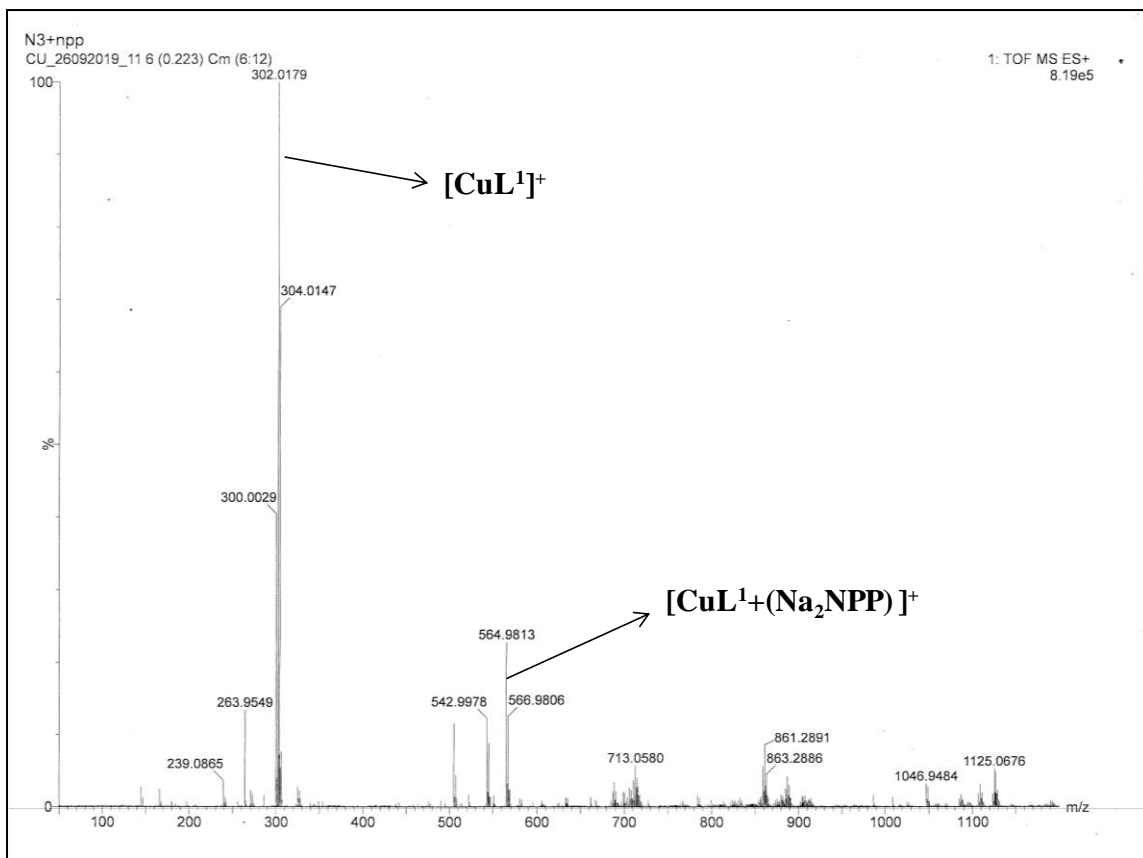

**Fig. S14** ESI-MS spectrum of intermediate species for the reaction mixture of complex **2** and 4-NPP recorded at room temperature.

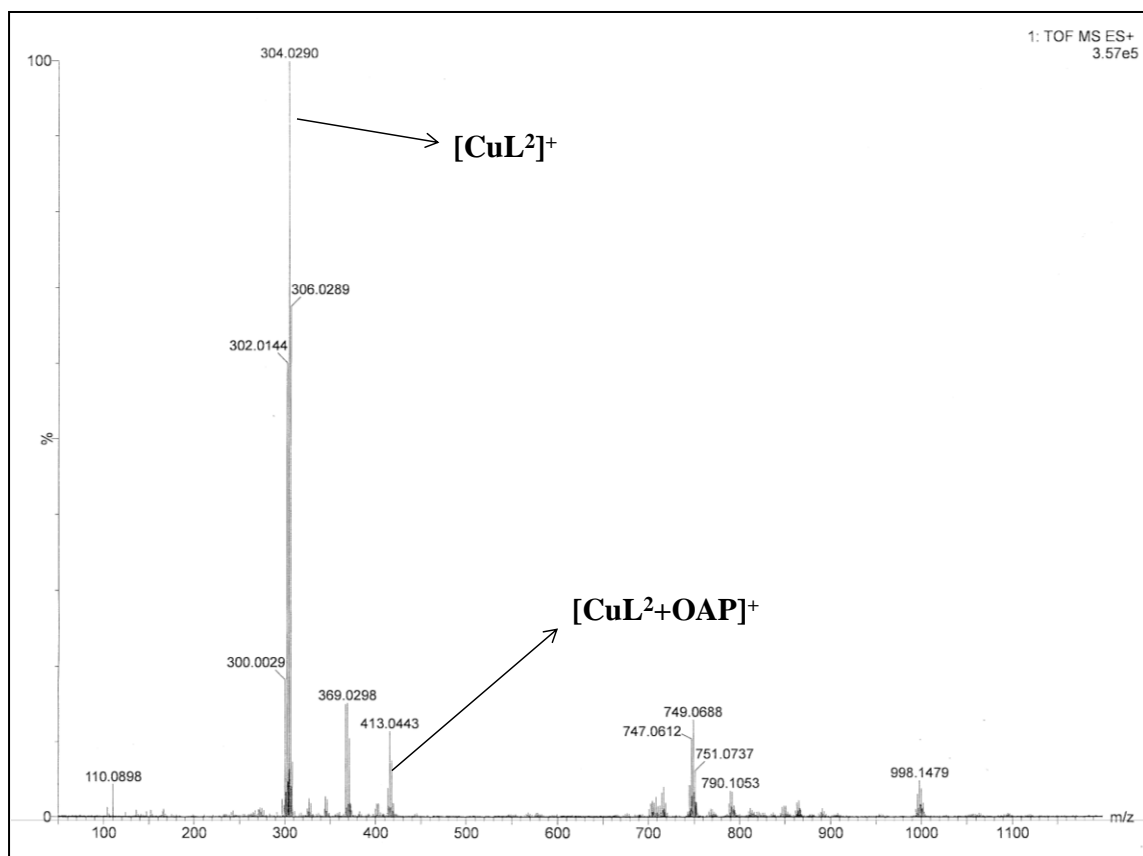

**Fig. S15** ESI-MS spectrum of intermediate species for the reaction mixture of complex **3** and OAP recorded at room temperature.

## XYZ Coordinates of the Optimized Structure

### Int1

#### Charge 0, multiplicity 2

|    |           |           |           |
|----|-----------|-----------|-----------|
| C  | -1.895800 | -0.590800 | 0.135400  |
| C  | -3.089000 | -1.359000 | 0.105800  |
| C  | -4.334400 | -0.774800 | -0.015500 |
| C  | -4.471400 | 0.618900  | -0.113600 |
| C  | -3.329100 | 1.393800  | -0.082700 |
| C  | -2.043000 | 0.829900  | 0.039500  |
| H  | -2.981600 | -2.437100 | 0.180700  |
| H  | -5.218500 | -1.406200 | -0.034200 |
| H  | -5.450000 | 1.075700  | -0.209600 |
| H  | -3.407600 | 2.476800  | -0.151800 |
| C  | -0.929900 | 1.762400  | 0.085800  |
| H  | -1.195700 | 2.826500  | 0.041900  |
| O  | -0.752600 | -1.215700 | 0.241100  |
| N  | 0.302600  | 1.435900  | 0.186100  |
| C  | 1.380500  | 2.414200  | 0.290700  |
| H  | 1.133800  | 3.344100  | -0.235400 |
| H  | 1.526200  | 2.640400  | 1.354400  |
| C  | 2.641500  | 1.744000  | -0.252800 |
| H  | 2.552600  | 1.678200  | -1.359400 |
| H  | 3.511200  | 2.394400  | -0.054600 |
| C  | 3.900800  | -0.271100 | -0.217300 |
| H  | 4.861300  | 0.237100  | -0.021900 |
| H  | 3.973500  | -1.278300 | 0.208300  |
| H  | 3.823200  | -0.381500 | -1.318300 |
| N  | 2.788100  | 0.442500  | 0.367400  |
| Cu | 1.063800  | -0.433400 | 0.225000  |
| O  | 0.925300  | -1.290400 | -1.951400 |
| H  | 0.040000  | -1.577800 | -1.660200 |
| H  | 0.759200  | -0.560200 | -2.567400 |
| O  | 1.568700  | -2.382800 | 0.823900  |
| H  | 2.014800  | -2.403000 | 1.685600  |
| H  | 0.661100  | -2.702900 | 0.981300  |

### Int2

#### Charge -1, multiplicity 2

|   |           |           |           |
|---|-----------|-----------|-----------|
| C | 0.929000  | -0.418400 | 1.510800  |
| C | 1.825800  | 0.376100  | 2.284100  |
| C | 3.165200  | 0.072200  | 2.399500  |
| C | 3.711300  | -1.057500 | 1.763600  |
| C | 2.864300  | -1.874800 | 1.042500  |
| C | 1.490100  | -1.592900 | 0.905000  |
| H | 1.409400  | 1.261400  | 2.756500  |
| H | 3.809400  | 0.722400  | 2.986400  |
| H | 4.768200  | -1.285700 | 1.847100  |
| H | 3.255700  | -2.764100 | 0.552000  |
| C | 0.702000  | -2.535000 | 0.140400  |
| H | 1.242300  | -3.410000 | -0.247100 |
| O | -0.304600 | -0.043600 | 1.407700  |
| N | -0.553300 | -2.430100 | -0.090600 |
| C | -1.295600 | -3.465100 | -0.799800 |
| H | -0.666600 | -3.979300 | -1.537500 |
| H | -1.639600 | -4.201300 | -0.061800 |
| C | -2.511900 | -2.792900 | -1.429900 |
| H | -2.167200 | -2.193100 | -2.303100 |
| H | -3.179600 | -3.570100 | -1.844100 |
| C | -4.302500 | -1.307200 | -1.015900 |
| H | -5.085300 | -2.018000 | -1.337600 |
| H | -4.766600 | -0.625600 | -0.291900 |

|    |           |           |           |
|----|-----------|-----------|-----------|
| H  | -4.041200 | -0.697600 | -1.902900 |
| N  | -3.172200 | -1.985400 | -0.428200 |
| Cu | -1.787400 | -0.871500 | 0.405500  |
| O  | -2.227000 | 0.920000  | -0.714300 |
| P  | -2.006200 | 2.280900  | -0.112500 |
| O  | -0.522200 | 2.856000  | -0.566100 |
| O  | -2.918300 | 3.333700  | -0.937700 |
| O  | -2.196200 | 2.492900  | 1.360900  |
| C  | 0.595200  | 2.101200  | -0.765300 |
| C  | 1.791300  | 2.616000  | -0.259700 |
| C  | 0.586100  | 0.915100  | -1.511000 |
| C  | 2.979400  | 1.927500  | -0.448900 |
| H  | 1.767300  | 3.546500  | 0.296200  |
| C  | 1.769800  | 0.218900  | -1.688000 |
| H  | -0.346000 | 0.540500  | -1.913300 |
| C  | 2.948400  | 0.727000  | -1.147100 |
| H  | 3.913200  | 2.295000  | -0.042100 |
| H  | 1.787400  | -0.715200 | -2.236200 |
| N  | 4.177300  | -0.034900 | -1.297800 |
| O  | 4.120500  | -1.111600 | -1.872800 |
| O  | 5.208600  | 0.432400  | -0.840000 |
| H  | -3.189700 | 4.067000  | -0.363100 |
| O  | -3.029200 | -0.021400 | 2.012100  |
| H  | -3.935400 | -0.003000 | 1.668900  |
| H  | -2.711200 | 0.915500  | 1.938900  |

### Int3

#### Charge 0, multiplicity 2

|    |           |           |           |
|----|-----------|-----------|-----------|
| C  | -1.957700 | -0.893500 | 0.262900  |
| C  | -2.488600 | -2.179100 | 0.135700  |
| C  | -3.816800 | -2.352100 | -0.232400 |
| C  | -4.639400 | -1.249500 | -0.470100 |
| C  | -4.109400 | 0.025100  | -0.346000 |
| C  | -2.767100 | 0.231500  | 0.008500  |
| H  | -1.845300 | -3.031700 | 0.331400  |
| H  | -4.213900 | -3.357600 | -0.328000 |
| H  | -5.677700 | -1.386700 | -0.749600 |
| H  | -4.733700 | 0.894700  | -0.533300 |
| C  | -2.298400 | 1.614400  | 0.079900  |
| H  | -3.077400 | 2.379100  | -0.019200 |
| O  | -0.673400 | -0.736400 | 0.663000  |
| N  | -1.084500 | 1.978500  | 0.228500  |
| C  | -0.719000 | 3.391500  | 0.290700  |
| H  | -1.492400 | 4.027200  | -0.154700 |
| H  | -0.607400 | 3.655500  | 1.348900  |
| C  | 0.631700  | 3.532500  | -0.402100 |
| H  | 0.491300  | 3.404500  | -1.493600 |
| H  | 1.011800  | 4.556400  | -0.254500 |
| C  | 2.809400  | 2.573900  | -0.553800 |
| H  | 3.314400  | 3.544200  | -0.418400 |
| H  | 3.467300  | 1.790500  | -0.171300 |
| H  | 2.696600  | 2.424000  | -1.643800 |
| N  | 1.548700  | 2.557200  | 0.157700  |
| Cu | 0.616600  | 0.849900  | 0.231100  |
| O  | 2.136100  | -0.386100 | -0.072800 |
| P  | 2.161600  | -1.903300 | -0.046300 |
| O  | 0.910800  | -2.633800 | 0.382300  |
| O  | 2.543800  | -2.471800 | -1.505800 |
| O  | 3.411200  | -2.280800 | 0.899600  |
| H  | 3.293900  | -1.994700 | -1.898000 |

H 3.449100 -3.233000 1.089500  
H -0.125000 -1.617300 0.613300

### TS

#### Charge -1, multiplicity 2

C -3.015900 1.642600 -0.183500  
C -2.978800 2.949600 -0.732100  
C -3.292700 4.067300 0.018000  
C -3.672700 3.949700 1.363200  
C -3.720000 2.688100 1.924100  
C -3.394700 1.531200 1.190300  
H -2.690900 3.045100 -1.775300  
H -3.245000 5.048700 -0.446100  
H -3.923500 4.827200 1.948500  
H -4.012900 2.568000 2.965000  
C -3.484600 0.263500 1.894800  
H -3.881900 0.309500 2.917100  
O -2.725800 0.623300 -0.953200  
N -3.137300 -0.869000 1.414000  
C -3.264200 -2.113500 2.161300  
H -3.276900 -1.935200 3.243500  
H -4.211600 -2.584400 1.870600  
C -2.109400 -3.011800 1.722400  
H -1.171100 -2.615500 2.168900  
H -2.251700 -4.017000 2.157200  
C -0.945000 -3.843100 -0.164600  
H -0.969200 -4.858500 0.268600  
H -0.963100 -3.976800 -1.253900  
H 0.041300 -3.411100 0.103300  
N -2.069300 -3.050900 0.275100  
Cu -2.153900 -1.183600 -0.323900  
O 0.122300 -0.413700 -0.101900  
P 0.295300 -0.162300 -1.581800  
O 1.698200 0.940100 -1.486500  
O 1.172600 -1.145300 -2.552900  
O -0.479600 1.053000 -2.291800  
C 2.792000 0.709700 -0.762700  
C 3.711200 1.774900 -0.658100  
C 3.096500 -0.518000 -0.138100  
C 4.893200 1.629200 0.039800  
H 3.463900 2.712300 -1.143900  
C 4.281800 -0.664800 0.563200  
H 2.397800 -1.342800 -0.189100  
C 5.169300 0.404100 0.647100  
H 5.601500 2.444500 0.121600  
H 4.525600 -1.602700 1.047400  
N 6.407800 0.240500 1.382300  
O 6.632100 -0.840500 1.908500  
O 7.174900 1.191200 1.443100  
H 2.067200 -0.795300 -2.685400  
H -1.441500 0.942100 -2.051100  
O -1.104600 -1.263600 -2.058700  
H -0.747000 -2.151900 -2.208900

### 1-INT1

#### Charge 0, multiplicity 2

C 1.904100000 -0.597300000 -0.152500000  
C 3.098900000 -1.365500000 -0.111300000  
C 4.343000000 -0.780200000 0.036600000  
C 4.476100000 0.614100000 0.151300000  
C 3.331300000 1.388500000 0.108400000

C 2.047100000 0.823800000 -0.040800000  
H 2.997200000 -2.443700000 -0.199400000  
H 5.227900000 -1.411100000 0.063200000  
H 5.452500000 1.072100000 0.267600000  
H 3.408300000 2.471300000 0.188600000  
C 0.932100000 1.756100000 -0.098100000  
H 1.194600000 2.820700000 -0.041400000  
O 0.763400000 -1.220900000 -0.282500000  
N -0.298100000 1.427600000 -0.221400000  
C -1.375300000 2.407200000 -0.329400000  
H -1.120800000 3.343500000 0.182100000  
H -1.529000000 2.617600000 -1.395500000  
C -2.633100000 1.749900000 0.235600000  
H -2.536000000 1.698000000 1.342300000  
H -3.503900000 2.398500000 0.033400000  
C -3.896300000 -0.264400000 0.254600000  
H -3.986600000 -1.275200000 -0.159200000  
H -3.793100000 -0.363300000 1.354400000  
N -2.791100000 0.437200000 -0.360100000  
Cu -1.054500000 -0.438500000 -0.246500000  
O -0.969700000 -1.205200000 1.963100000  
H -0.044200000 -1.483700000 1.852000000  
H -0.957700000 -0.519000000 2.647500000  
O -1.582800000 -2.404500000 -0.775500000  
H -2.102500000 -2.496400000 -1.589500000  
H -0.698800000 -2.766200000 -0.969200000  
C -5.234700000 0.454300000 0.002000000  
H -5.359800000 1.237900000 0.719800000  
H -5.235700000 0.870200000 -0.983900000  
C -6.391600000 -0.553400000 0.135100000  
H -7.325400000 -0.034900000 0.070600000  
H -6.328900000 -1.274600000 -0.652800000  
H -6.324400000 -1.050700000 1.080100000

### 1-INT4

#### Charge -1, multiplicity 2

C 3.542200000 0.471474000 0.259472000  
C 3.018584000 -0.635203000 -0.482475000  
C 3.969677000 -1.560979000 -0.999706000  
C 5.328408000 -1.399796000 -0.805622000  
C 5.833164000 -0.306213000 -0.078441000  
C 4.934217000 0.606135000 0.442491000  
H 3.583327000 -2.407278000 -1.561453000  
H 6.015879000 -2.131934000 -1.222280000  
H 6.900570000 -0.183751000 0.072376000  
H 5.295757000 1.459132000 1.014496000  
C 2.693839000 1.474807000 0.871532000  
H 3.209033000 2.248146000 1.456973000  
C 0.641926000 2.535857000 1.484504000  
H 0.276520000 2.093249000 2.420334000  
H 1.258250000 3.411105000 1.726378000  
C -0.553209000 2.883438000 0.604293000  
H -1.239488000 3.521712000 1.188361000  
H -0.198858000 3.508653000 -0.243967000  
N -1.174614000 1.655269000 0.156720000  
Cu 0.186958000 0.325850000 -0.315893000  
O 1.754152000 -0.842107000 -0.703353000  
N 1.416014000 1.513165000 0.789087000  
C -2.282376000 1.899240000 -0.739667000  
H -2.068345000 2.748727000 -1.425381000  
H -2.421010000 1.015863000 -1.374323000  
C -3.615113000 2.184763000 -0.034925000

|   |              |              |              |
|---|--------------|--------------|--------------|
| H | -3.860621000 | 1.313886000  | 0.587297000  |
| H | -3.502129000 | 3.041540000  | 0.643500000  |
| C | -4.745595000 | 2.451715000  | -1.026925000 |
| H | -4.881401000 | 1.594048000  | -1.697878000 |
| H | -5.699491000 | 2.634006000  | -0.521034000 |
| H | -4.523614000 | 3.326492000  | -1.649847000 |
| O | -0.972098000 | -1.002257000 | -1.241305000 |
| C | -1.939770000 | -1.539629000 | -0.513430000 |
| C | -1.615097000 | -2.299925000 | 0.651825000  |
| C | -3.300003000 | -1.415791000 | -0.845485000 |
| C | -2.630080000 | -2.825447000 | 1.450420000  |
| C | -4.310396000 | -1.956143000 | -0.043681000 |
| H | -3.552940000 | -0.861558000 | -1.746431000 |
| C | -3.978875000 | -2.647269000 | 1.119676000  |
| H | -2.356387000 | -3.397383000 | 2.335602000  |
| H | -5.351798000 | -1.824836000 | -0.327709000 |
| H | -4.752431000 | -3.063118000 | 1.759164000  |
| N | -0.261756000 | -2.555677000 | 0.931150000  |
| H | 0.395956000  | -2.040261000 | 0.349510000  |
| H | -0.011525000 | -2.516678000 | 1.912639000  |

### 1-INT5

#### Charge -2, multiplicity 2

|    |              |              |              |
|----|--------------|--------------|--------------|
| C  | -3.007520000 | -0.952814000 | 0.658984000  |
| C  | -2.355601000 | -1.698667000 | -0.390272000 |
| C  | -3.142715000 | -2.736086000 | -0.989764000 |
| C  | -4.442340000 | -3.011413000 | -0.606267000 |
| C  | -5.071689000 | -2.256146000 | 0.397408000  |
| C  | -4.344344000 | -1.235698000 | 0.994007000  |
| H  | -2.666827000 | -3.311514000 | -1.780632000 |
| H  | -4.983961000 | -3.816672000 | -1.098696000 |
| H  | -6.097013000 | -2.457323000 | 0.691388000  |
| H  | -4.814419000 | -0.625197000 | 1.765223000  |
| C  | -2.387103000 | 0.173610000  | 1.365207000  |
| H  | -3.107883000 | 0.911382000  | 1.760880000  |
| C  | -0.716667000 | 1.626749000  | 2.126074000  |
| H  | -1.560833000 | 2.331654000  | 2.200728000  |
| H  | -0.352544000 | 1.437756000  | 3.146988000  |
| C  | 0.457765000  | 2.235253000  | 1.292719000  |
| H  | 0.570806000  | 3.283695000  | 1.650126000  |
| H  | 1.365404000  | 1.697260000  | 1.618342000  |
| N  | 0.386597000  | 2.156769000  | -0.142661000 |
| Cu | 0.120271000  | 0.126440000  | -0.431333000 |
| O  | -1.160933000 | -1.484374000 | -0.819652000 |
| N  | -1.137078000 | 0.367437000  | 1.535402000  |
| C  | -0.495612000 | 3.132488000  | -0.731662000 |
| H  | -0.365612000 | 4.126529000  | -0.242356000 |
| H  | -0.202621000 | 3.280088000  | -1.787510000 |
| C  | -2.012572000 | 2.848673000  | -0.756187000 |
| H  | -2.170730000 | 1.850783000  | -1.190101000 |
| H  | -2.404951000 | 2.807283000  | 0.267248000  |
| C  | -2.782569000 | 3.899805000  | -1.555304000 |
| H  | -2.429499000 | 3.935941000  | -2.593396000 |
| H  | -3.858234000 | 3.694102000  | -1.575629000 |
| H  | -2.642616000 | 4.899232000  | -1.125034000 |
| O  | 1.880395000  | -1.194524000 | -0.253600000 |
| C  | 3.087287000  | -0.802088000 | -0.148731000 |
| C  | 4.194178000  | -1.781632000 | -0.029581000 |
| C  | 3.429339000  | 0.591029000  | -0.143333000 |
| C  | 5.532787000  | -1.257152000 | 0.086294000  |
| C  | 4.733921000  | 1.023006000  | -0.030742000 |
| H  | 2.599456000  | 1.295183000  | -0.232688000 |

|   |             |              |              |
|---|-------------|--------------|--------------|
| C | 5.800193000 | 0.089961000  | 0.085613000  |
| H | 6.345563000 | -1.977455000 | 0.175518000  |
| H | 4.953386000 | 2.088355000  | -0.030815000 |
| H | 6.823739000 | 0.444814000  | 0.173938000  |
| N | 3.909096000 | -3.076272000 | -0.035660000 |
| H | 4.785102000 | -3.600298000 | 0.054801000  |

### 1-INT6

#### Charge -1, multiplicity 1

|    |              |              |              |
|----|--------------|--------------|--------------|
| C  | -2.257400000 | 0.953762000  | 0.344392000  |
| C  | -2.365157000 | -0.222287000 | -0.463992000 |
| C  | -3.654400000 | -0.528695000 | -0.970026000 |
| C  | -4.757683000 | 0.275808000  | -0.727297000 |
| C  | -4.630824000 | 1.451939000  | 0.022237000  |
| C  | -3.379427000 | 1.775461000  | 0.531545000  |
| H  | -3.746153000 | -1.426107000 | -1.576933000 |
| H  | -5.724272000 | -0.006121000 | -1.138147000 |
| H  | -5.485384000 | 2.096734000  | 0.200891000  |
| H  | -3.255751000 | 2.687078000  | 1.114800000  |
| C  | -0.996751000 | 1.393311000  | 0.974646000  |
| H  | -0.812516000 | 2.480783000  | 0.977403000  |
| C  | 1.109407000  | 1.114283000  | 2.001908000  |
| H  | 1.319573000  | 2.110470000  | 1.585305000  |
| H  | 1.031678000  | 1.209940000  | 3.094183000  |
| C  | 2.240231000  | 0.105350000  | 1.681586000  |
| H  | 3.189204000  | 0.544984000  | 2.040802000  |
| H  | 2.039162000  | -0.771996000 | 2.319820000  |
| N  | 2.356355000  | -0.339111000 | 0.303636000  |
| Cu | 0.528287000  | -0.610088000 | -0.406140000 |
| O  | -1.358300000 | -1.000262000 | -0.794646000 |
| N  | -0.153686000 | 0.591936000  | 1.496405000  |
| C  | 3.326295000  | 0.401744000  | -0.474727000 |
| H  | 4.303395000  | 0.436207000  | 0.051965000  |
| H  | 3.505124000  | -0.148169000 | -1.412680000 |
| C  | 2.963613000  | 1.847929000  | -0.848448000 |
| H  | 1.967828000  | 1.845179000  | -1.316523000 |
| H  | 2.881212000  | 2.451082000  | 0.065304000  |
| C  | 3.990841000  | 2.480898000  | -1.785777000 |
| H  | 4.064317000  | 1.915729000  | -2.722589000 |
| H  | 3.731860000  | 3.514514000  | -2.037266000 |
| H  | 4.986150000  | 2.489163000  | -1.325243000 |
| O  | 2.366364000  | -3.052155000 | 0.353752000  |
| H  | 1.405500000  | -3.213440000 | 0.292962000  |
| O  | -0.553537000 | -3.424751000 | 0.142245000  |
| H  | -0.769253000 | -4.125747000 | -0.489419000 |
| H  | 2.457701000  | -2.037163000 | 0.322274000  |
| H  | -0.997076000 | -2.610015000 | -0.196225000 |

### 3-INT1

#### Charge = -1 Multiplicity = 2

|   |             |              |              |
|---|-------------|--------------|--------------|
| C | 3.508297000 | 0.253987000  | 0.048273000  |
| C | 2.736766000 | -0.823011000 | -0.471905000 |
| C | 3.209263000 | -2.132842000 | -0.209957000 |
| C | 4.371402000 | -2.349838000 | 0.515488000  |
| C | 5.120361000 | -1.282691000 | 1.016751000  |
| C | 4.669670000 | 0.012766000  | 0.776103000  |
| H | 2.621268000 | -2.961439000 | -0.595034000 |
| H | 4.699956000 | -3.370954000 | 0.697415000  |
| H | 6.029067000 | -1.457285000 | 1.584354000  |
| H | 5.232802000 | 0.864006000  | 1.158454000  |
| C | 3.010456000 | 1.643611000  | -0.211630000 |
| H | 3.698604000 | 2.389904000  | 0.216785000  |

|    |              |              |              |   |              |              |              |
|----|--------------|--------------|--------------|---|--------------|--------------|--------------|
| C  | 1.124402000  | 3.172847000  | 0.292918000  | H | -1.953069000 | 3.359365000  | -0.703713000 |
| H  | 1.675607000  | 3.841276000  | 0.973107000  | H | -2.350496000 | 1.771006000  | -0.022668000 |
| H  | 1.249096000  | 3.533264000  | -0.734291000 | C | -1.169072000 | 3.012731000  | 1.256710000  |
| C  | -0.361540000 | 3.091541000  | 0.611158000  | H | -0.712966000 | 2.186534000  | 1.818626000  |
| H  | -0.459263000 | 2.842958000  | 1.694217000  | H | -0.408720000 | 3.803019000  | 1.175847000  |
| H  | -0.810239000 | 4.099097000  | 0.503377000  | C | -2.391969000 | 3.550573000  | 1.997860000  |
| N  | -0.944148000 | 2.145778000  | -0.293506000 | H | -3.140501000 | 2.759373000  | 2.120414000  |
| Cu | 0.179085000  | 0.607135000  | -0.689024000 | H | -2.145434000 | 3.938175000  | 2.994224000  |
| O  | 1.651038000  | -0.628578000 | -1.170429000 | H | -2.864381000 | 4.363459000  | 1.430313000  |
| N  | 1.654855000  | 1.805444000  | 0.337418000  | O | -1.595880000 | -1.087237000 | 0.709717000  |
| C  | -2.379652000 | 2.083186000  | -0.225956000 | C | -2.719067000 | -1.216484000 | 0.150950000  |
| H  | -2.812546000 | 3.094648000  | -0.386035000 | C | -3.806153000 | -2.008657000 | 0.793699000  |
| H  | -2.730094000 | 1.454479000  | -1.052251000 | C | -3.014752000 | -1.067945000 | -1.119807000 |
| C  | -2.969754000 | 1.528792000  | 1.080650000  | C | -5.046767000 | -2.121200000 | 0.069485000  |
| H  | -2.620416000 | 0.495939000  | 1.208896000  | C | -4.232943000 | -0.753599000 | -1.744866000 |
| H  | -2.592873000 | 2.109246000  | 1.934750000  | H | -2.224723000 | 0.006232000  | -1.554407000 |
| C  | -4.495550000 | 1.561607000  | 1.076690000  | C | -5.262420000 | -1.523637000 | -1.149390000 |
| H  | -4.881575000 | 0.982688000  | 0.231137000  | H | -5.838082000 | -2.710702000 | 0.537355000  |
| H  | -4.916158000 | 1.130712000  | 1.991437000  | H | -4.408843000 | -0.267624000 | -2.702895000 |
| H  | -4.866806000 | 2.590190000  | 0.982514000  | H | -6.221004000 | -1.637630000 | -1.653394000 |
| O  | -1.152830000 | -0.567380000 | -1.511325000 | N | -3.586089000 | -2.559264000 | 1.973995000  |
| C  | -2.014953000 | -1.254898000 | -0.795639000 | H | -4.449949000 | -3.054689000 | 2.234950000  |
| C  | -1.567266000 | -2.163140000 | 0.215317000  | H | 3.811895000  | 1.758725000  | 0.968836000  |
| C  | -3.404030000 | -1.156277000 | -0.995220000 | H | 2.040832000  | 0.934516000  | -1.182630000 |
| C  | -2.489795000 | -2.822924000 | 1.020580000  |   |              |              |              |
| C  | -4.317288000 | -1.833259000 | -0.186100000 |   |              |              |              |
| H  | -3.746322000 | -0.497160000 | -1.789412000 |   |              |              |              |
| C  | -3.866097000 | -2.649437000 | 0.844883000  |   |              |              |              |
| H  | -2.114285000 | -3.505035000 | 1.781794000  |   |              |              |              |
| H  | -5.384136000 | -1.706539000 | -0.358068000 |   |              |              |              |
| H  | -4.567676000 | -3.171461000 | 1.489769000  |   |              |              |              |
| N  | -0.187340000 | -2.407139000 | 0.325582000  |   |              |              |              |
| H  | 0.357405000  | -1.896269000 | -0.369422000 |   |              |              |              |
| H  | 0.201176000  | -2.304214000 | 1.255564000  |   |              |              |              |
| H  | 2.930340000  | 1.835017000  | -1.289926000 |   |              |              |              |
| H  | 1.656213000  | 1.478965000  | 1.305710000  |   |              |              |              |

### 3-INT4

Charge = -2 Multiplicity = 2

|    |              |              |              |
|----|--------------|--------------|--------------|
| C  | 3.721534000  | -0.281462000 | 0.320709000  |
| C  | 2.886129000  | -1.369717000 | -0.115589000 |
| C  | 3.540636000  | -2.632525000 | -0.256905000 |
| C  | 4.893059000  | -2.800819000 | -0.003449000 |
| C  | 5.688403000  | -1.729934000 | 0.411691000  |
| C  | 5.073443000  | -0.483892000 | 0.563439000  |
| H  | 2.921398000  | -3.467753000 | -0.574824000 |
| H  | 5.339011000  | -3.788203000 | -0.129685000 |
| H  | 6.749526000  | -1.858597000 | 0.610241000  |
| H  | 5.668382000  | 0.372749000  | 0.884842000  |
| C  | 3.087326000  | 1.068503000  | 0.510603000  |
| H  | 2.240455000  | 0.973144000  | 1.220914000  |
| C  | 1.811962000  | 2.850984000  | -0.565080000 |
| H  | 1.536905000  | 2.971818000  | 0.495298000  |
| H  | 2.400102000  | 3.741877000  | -0.853102000 |
| C  | 0.505997000  | 2.773113000  | -1.385084000 |
| H  | 0.096182000  | 3.805095000  | -1.456901000 |
| H  | 0.823364000  | 2.507883000  | -2.414600000 |
| N  | -0.482813000 | 1.848071000  | -0.906807000 |
| Cu | 0.019927000  | 0.010821000  | -0.193884000 |
| O  | 1.636753000  | -1.240450000 | -0.373741000 |
| N  | 2.629133000  | 1.649718000  | -0.752659000 |
| C  | -1.521406000 | 2.485672000  | -0.153298000 |
